# Supplementary material for: Water vapor assisted aramid nanofiber reinforcement for strong, tough and ionically conductive organohydrogels as high-performance strain sensors
Source: Royal Society of Chemistry journal article supplement (doi:10.1039/d3mh01560b), 2023-12-14
Supplement: d3mh01560b1.pdf [file d3mh01560b1.pdf]

1 **Water vapor assisted aramid nanofiber reinforcement for strong, tough and**  
2 **ionically conductive organohydrogels as high-performance strain sensors**

3

4 Yongchuan Wu<sup>a, 1</sup>, Ya Zhang<sup>a, 1</sup>, Zimin Liao<sup>a</sup>, Jing Wen<sup>a</sup>, Hechuan Zhang<sup>a</sup>, Haidi Wu<sup>a</sup>, Zhanqi Liu<sup>a</sup>,  
5 Yongqian Shi<sup>b</sup>, Pingan Song<sup>c</sup>, Longcheng Tang<sup>d</sup>, Huaiguo Xue<sup>a</sup>, Jiefeng Gao<sup>\*a</sup>

6

7 <sup>a</sup> *School of Chemistry and Chemical Engineering, Yangzhou University, No 180, Road Siwangting,*  
8 *Yangzhou, Jiangsu, 225002, China.*

9 <sup>b</sup> *College of Environment and Safety Engineering, Fuzhou University, Fuzhou 350116, China*

10 <sup>c</sup> *Centre for Future Materials, University of Southern Queensland, Springfield Campus, QLD 4300,*  
11 *Australia*

12 <sup>d</sup> *College of Material, Chemistry and Chemical Engineering, Key Laboratory of Organosilicon*  
13 *Chemistry and Material Technology of MoE, Key Laboratory of Silicone Materials Technology of*  
14 *Zhejiang Province, Hangzhou Normal University, Hangzhou 311121, China*

15 <sup>1</sup> These authors contribute equally to this article and should be considered as co-first authors.

16 \*Corresponding author: E-mail address: jfgao@yzu.edu.cn

17

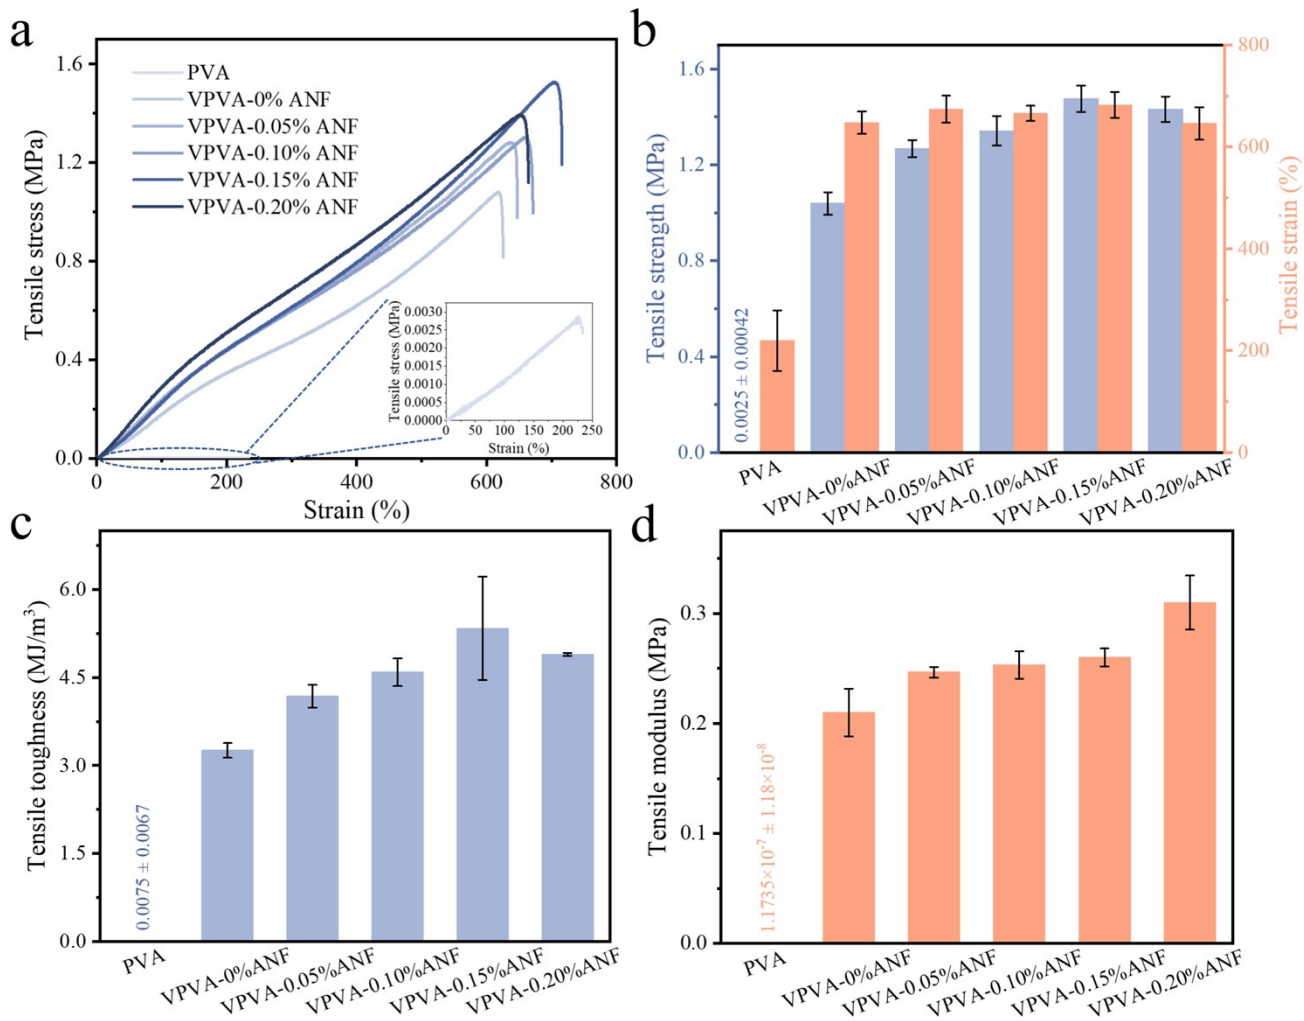

18  
 19 **Figure S1.** (a) Stress-strain curve, (b) the corresponding tensile strength and tensile strain, (c) tensile  
 20 toughness and (d) tensile modulus of PVA organogel and VPVA-ANF organohydrogels with  
 21 different mass fractions of ANF.

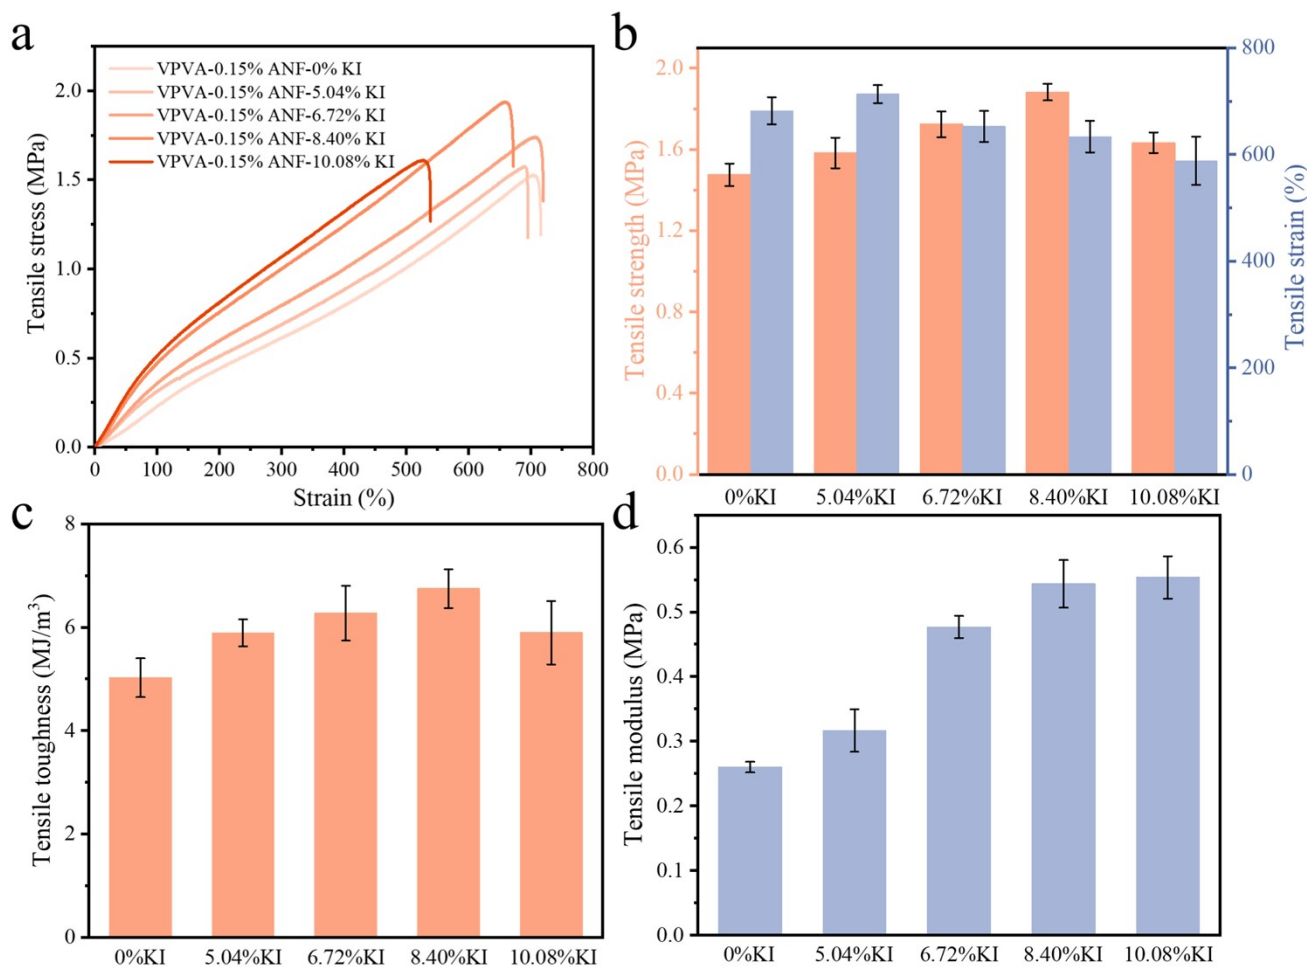

23

24 **Figure S2.** (a) Stress-strain curve, (b) the corresponding tensile strength and tensile strain, (c) tensile  
 25 toughness and (d) tensile modulus of VPVA-ANF-KI organohydrogels with different mass fractions  
 26 of KI.

27

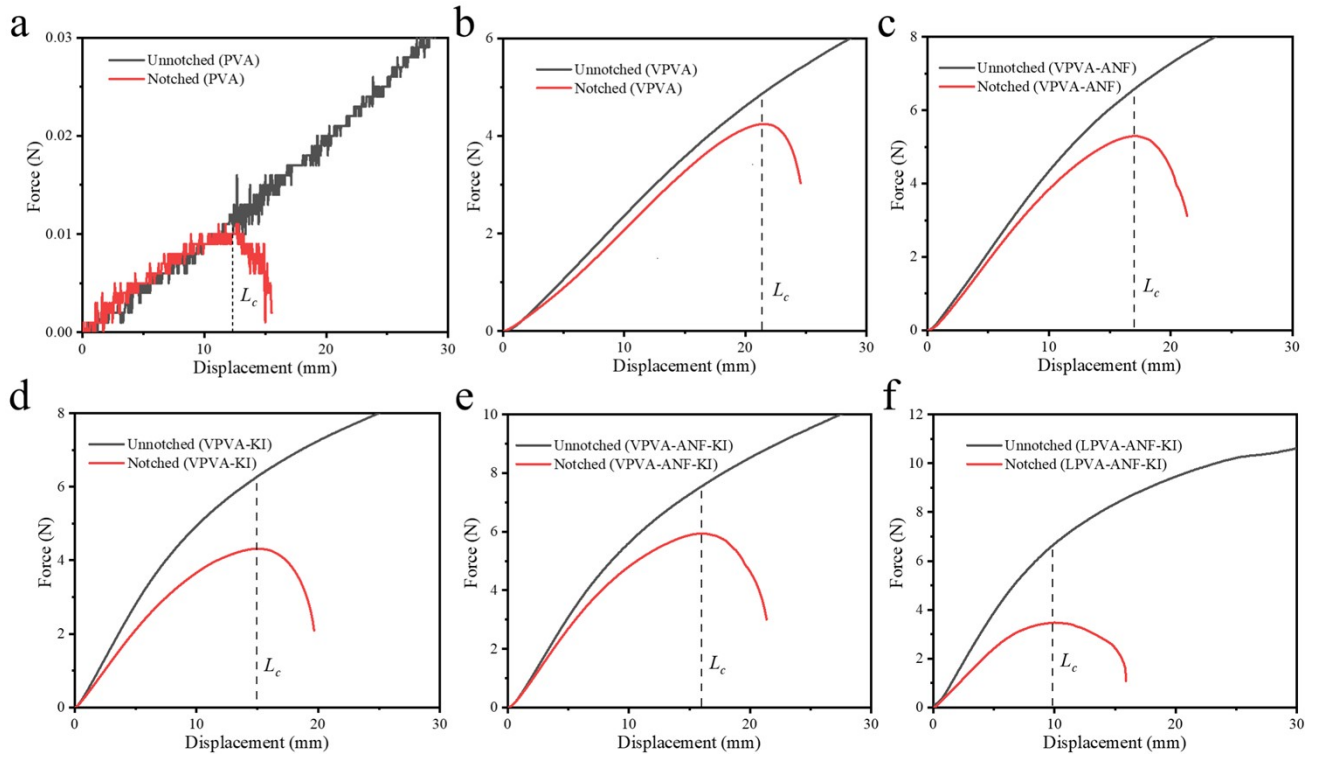

28

29 **Figure S3.** The force-displacement curves of unnotched and notched (a) PVA, (b) VPVA, (c)  
 30 VPVA-ANF, (d) VPVA-KI, (e) VPVA-ANF-KI and (f) LPVA-ANF-KI.

31

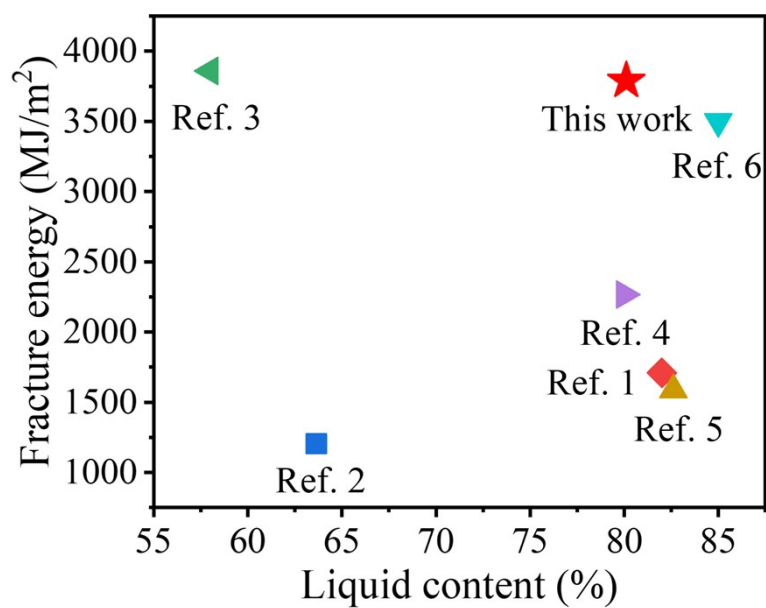

32

33 **Figure S4.** Comparison chart by plotting the fracture energy versus liquid content among tough  
 34 organohydrogels, (i.e., PVA/Gly-1,<sup>[1]</sup> PVA/P(AM-co-SBMA)/CaCl<sub>2</sub>/Gly,<sup>[2]</sup> BSA/PAAm/Gly,<sup>[3]</sup>  
 35 PAAm/PAA/PAD/CNT/Gly,<sup>[4]</sup> PVA/Gly-2,<sup>[5]</sup> and PVA/EG<sup>[6]</sup>).

36

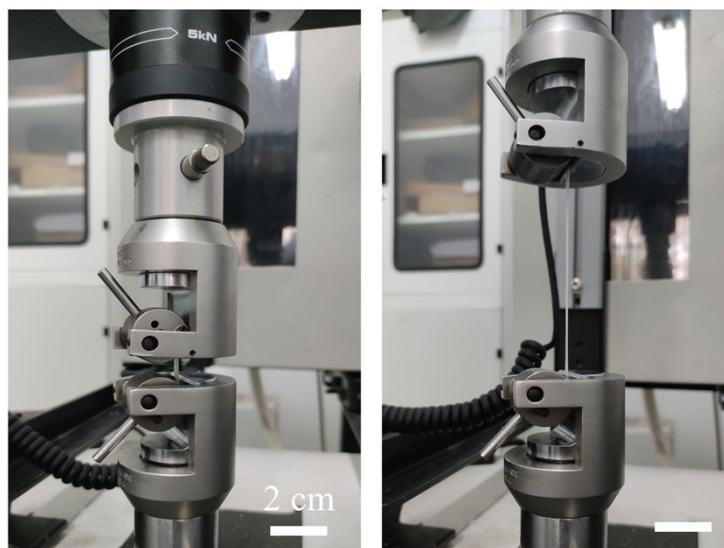

0% strain

over 600% strain

37  
38 **Figure S5.** The image showing the VPVA-ANF-KI organohydrogel with an elongation exceeding  
39 600% of its original length.

40

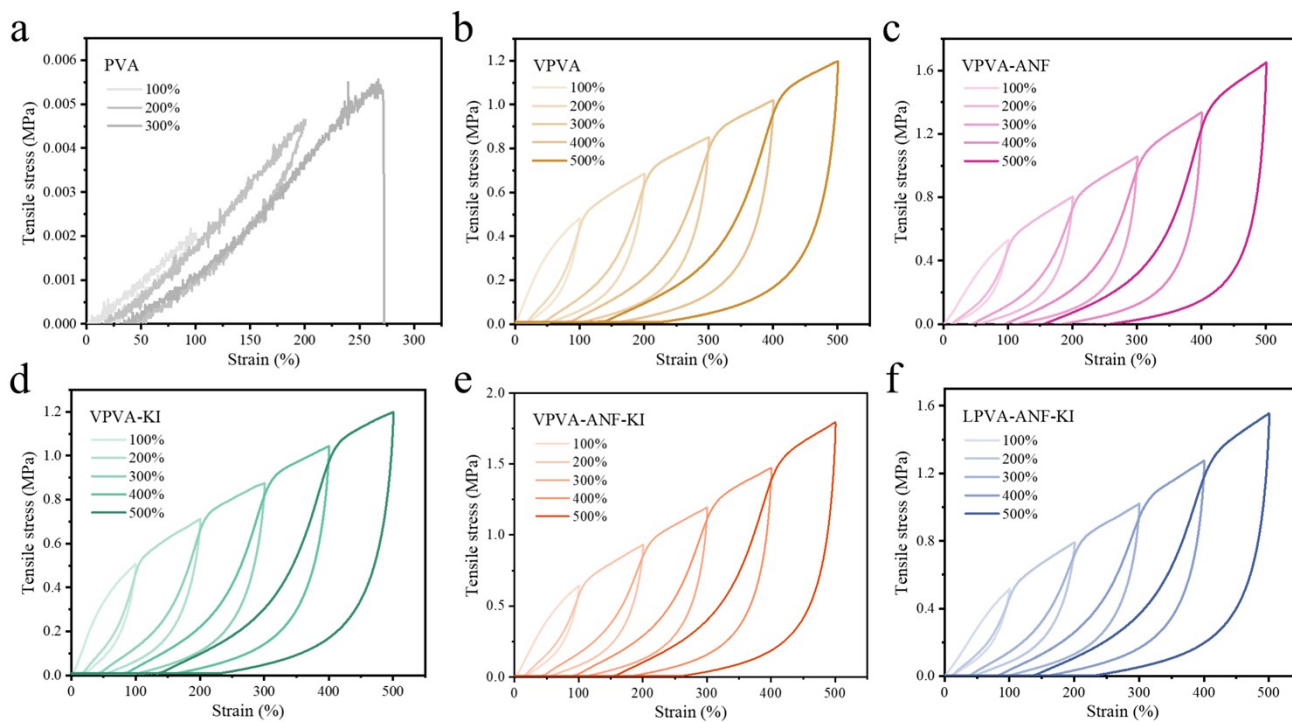

41

42 **Figure S6.** Sequential tensile loading-unloading tests without interval under incremental strains for  
 43 (a) PVA, (b) VPVA, (c) VPVA-ANF, (d) VPVA-KI, (e) VPVA-ANF-KI and (f) LPVA-ANF-KI.

44

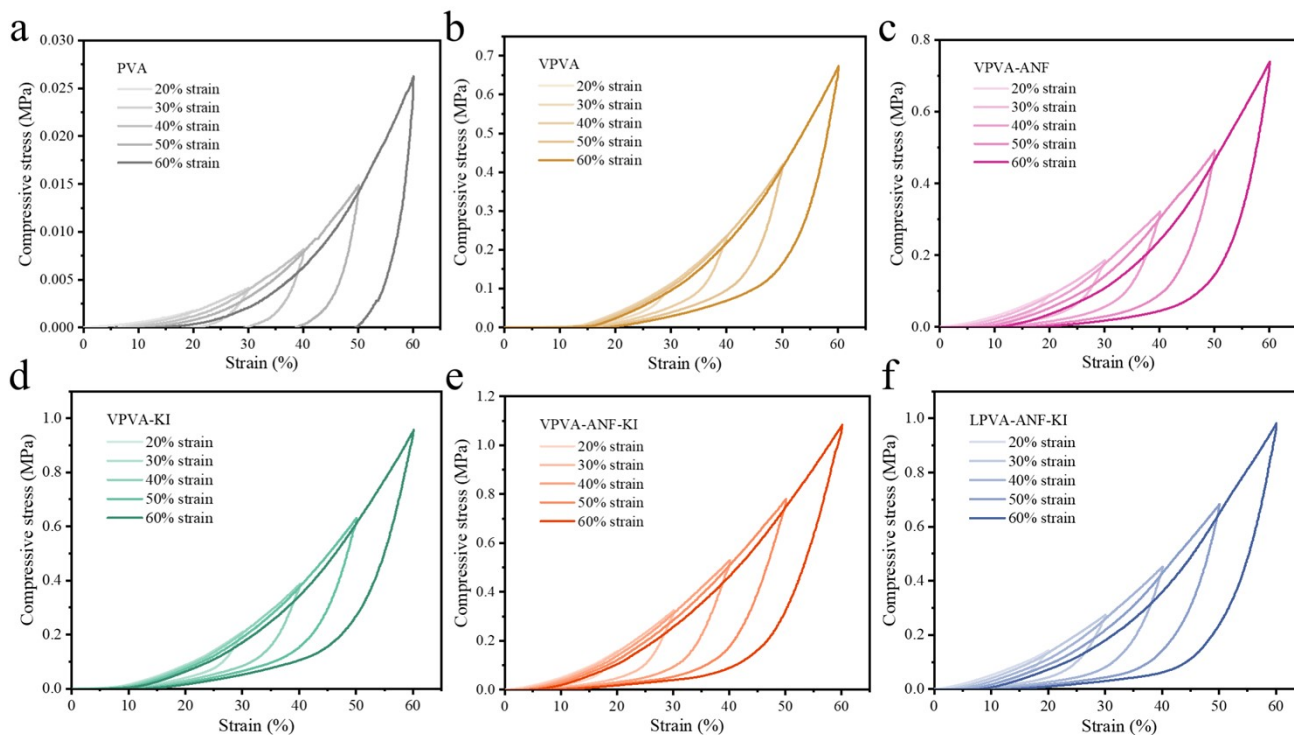

45  
 46 **Figure S7.** Sequential compressive loading-unloading tests without interval under incremental  
 47 strains for (a) PVA, (b) VPVA, (c) VPVA-ANF, (d) VPVA-KI, (e) VPVA-ANF-KI and (f) LPVA-  
 48 ANF-KI.

49



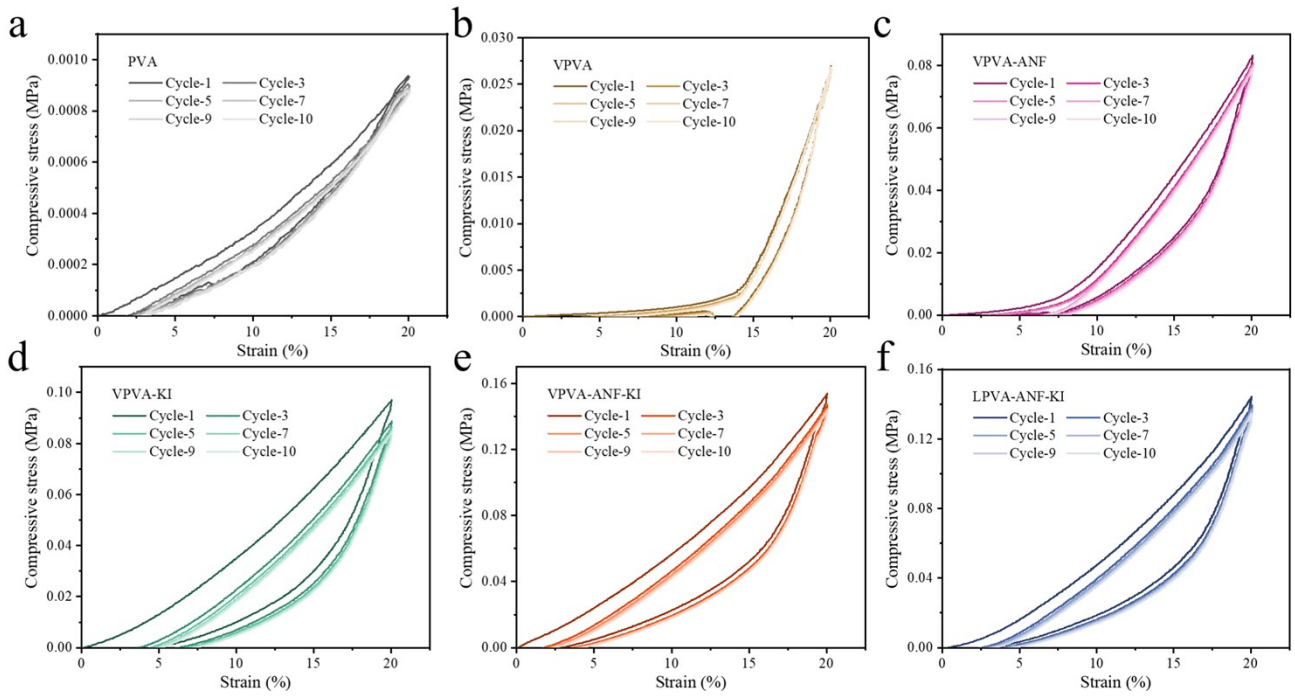

50

51 **Figure S8.** Cyclic stress-strain curves are shown for (a) PVA, (b) VPVA, (c) VPVA-ANF, (d)  
 52 VPVA-KI, (e) VPVA-ANF-KI and (f) LPVA-ANF-KI subjected to 10 cycles of 20% compressive  
 53 strains.

54

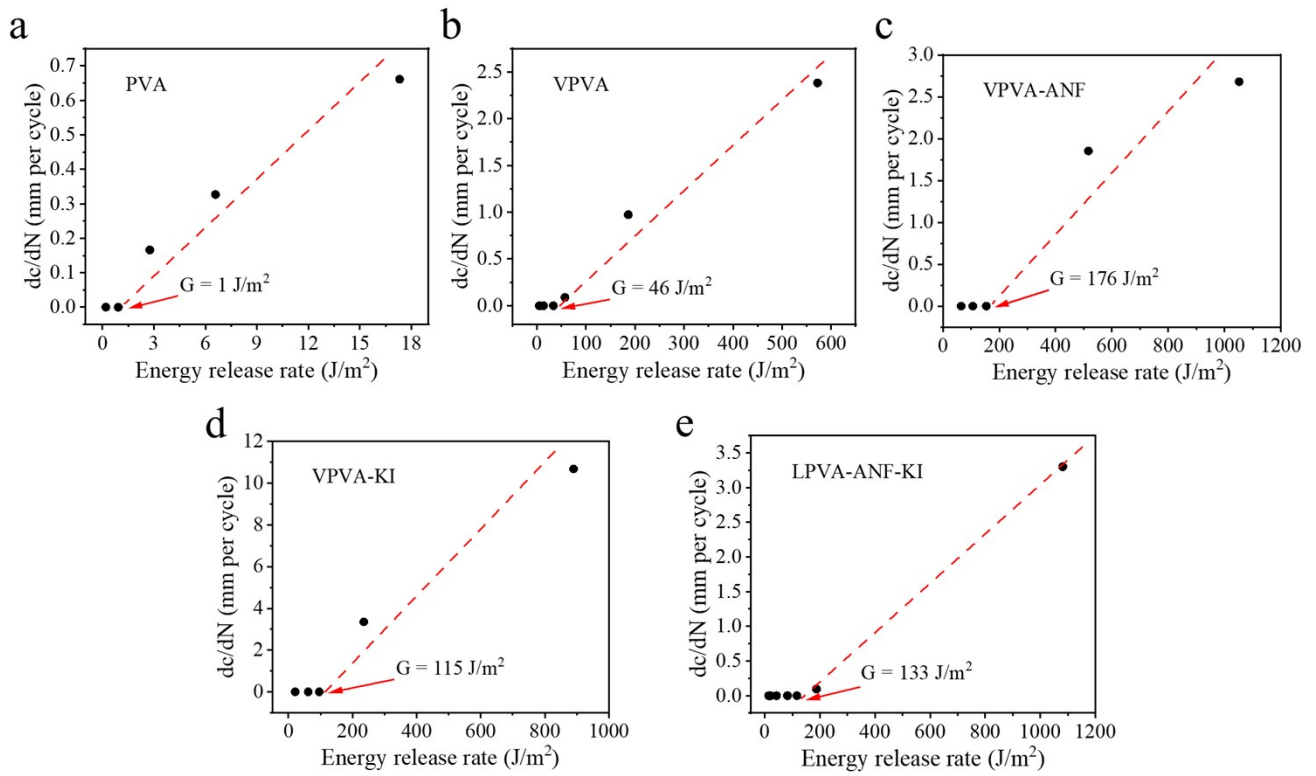

55

56 **Figure S9.** Crack extension per cycle  $dc/dN$  versus applied energy release rate for (a) PVA, (b)

57 VPVA, (c) VPVA-ANF, (d) VPVA-KI and LPVA-ANF-KI.

58

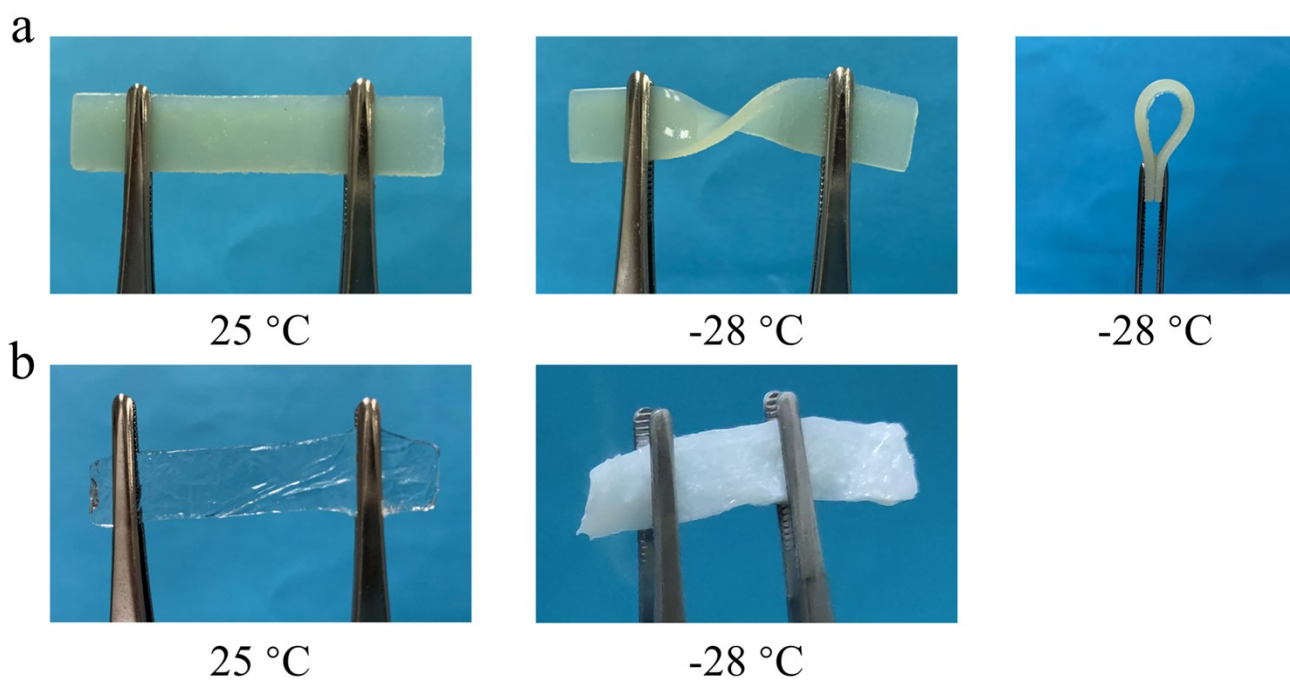

59  
60 **Figure S10.** Photographs of the anti-freezing behavior of (a) the VPVA-ANF-KI organohydrogel  
61 and (b) PVA organogel.  
62

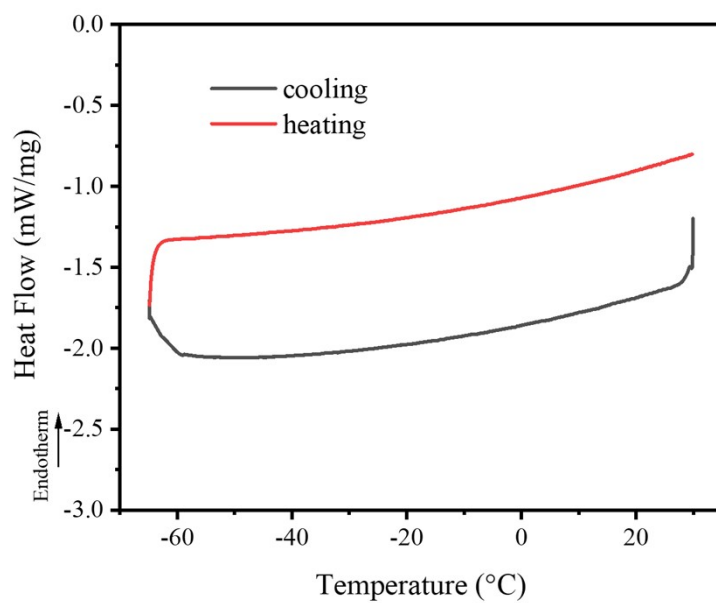

63  
64 **Figure S11.** Heat flow curves of VPVA-ANF-KI organohydrogel during the heating and cooling  
65 process.  
66

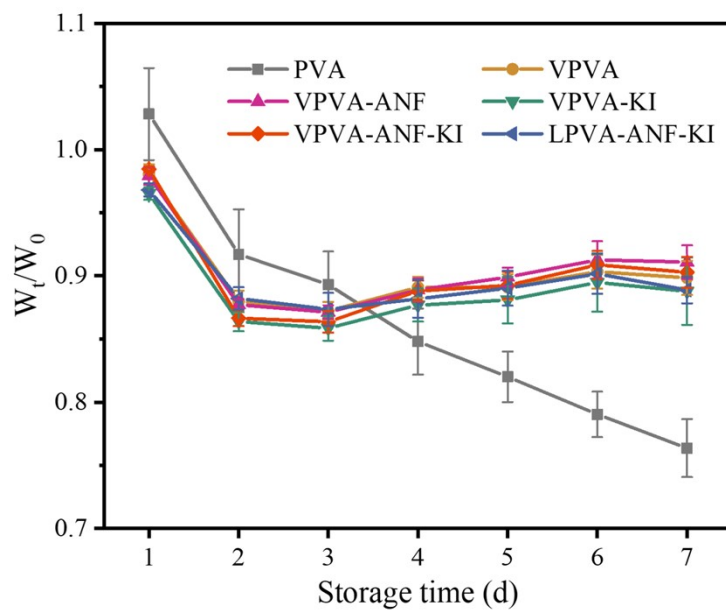

67

68 **Figure S12.** The weight changes of PVA, VPVA, VPVA-ANF, VPVA-KI, VPVA-ANF-KI and  
 69 LPVA-ANF-KI in the normal environment for 7 d.  $W_0$  and  $W_t$  are the initial weight and the weight in  
 70 the corresponding storage days of gels.

71

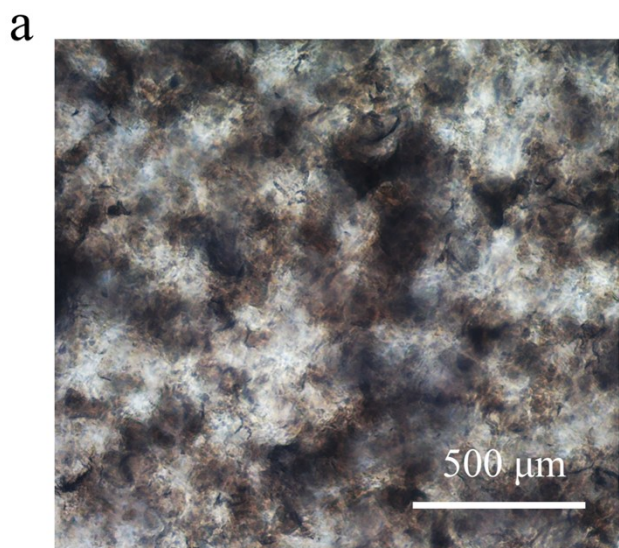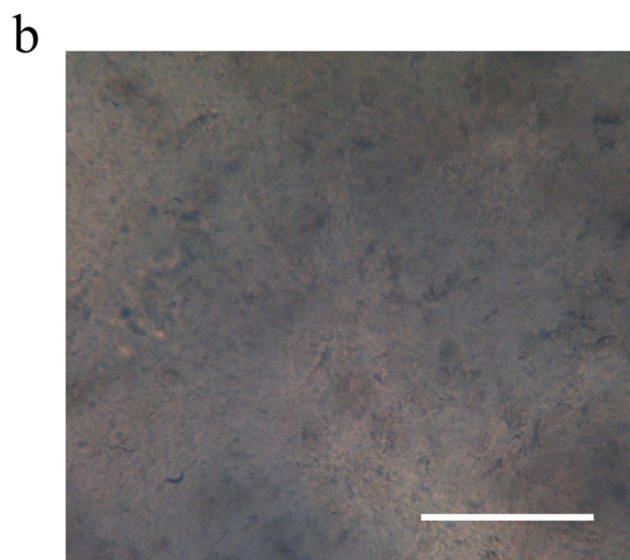

72  
73 **Figure S13.** The optical microscope image displaying cross-section of (a) LPVA-ANF-KI and (b)  
74 VPVA-ANF-KI. Scale bar, 500  $\mu\text{m}$ .  
75

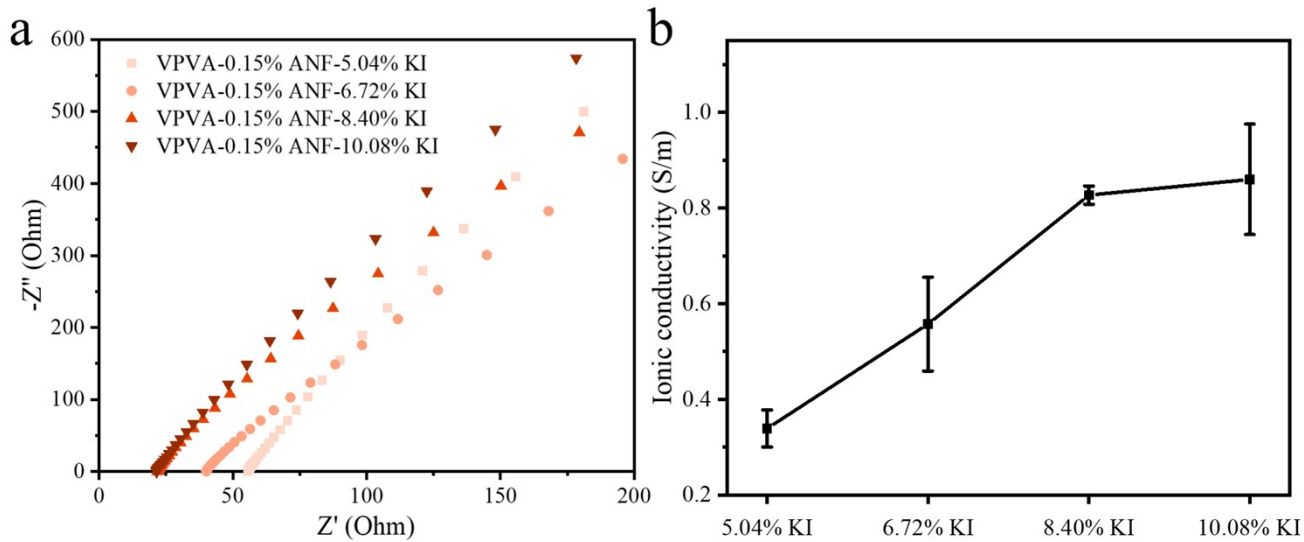

76

77 **Figure S14.** (a) Nyquist plots and (b) ionic conductivity of VPVA-ANF-KI with varying KI content.

78

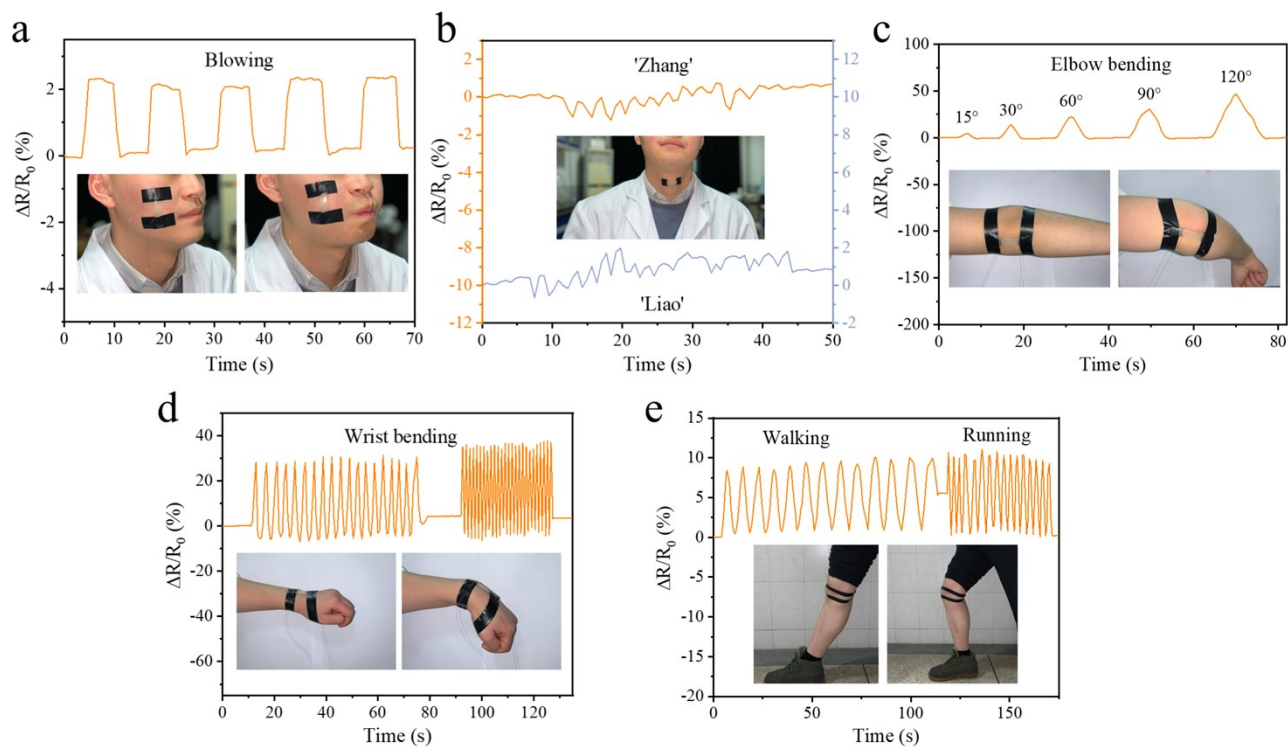

79

80 **Figure S15.** Demonstration of VPVA-ANF-KI sensor used for monitoring human activities,  
 81 including (a) blowing, (b) voice recognizing, (c) elbow bending, (d) wrist bending and (e) walking  
 82 and running.

83



84 **Supplementary Table 1.** A series of synthesis schemes for organogel and organohydrogels.

| Sample                     | PVA<br>(g) | DMSO<br>(g) | 2wt% ANF<br>(g) | KI/DMSO<br>(g) |             | Water<br>vapor (g) | Liquid<br>water (g) |
|----------------------------|------------|-------------|-----------------|----------------|-------------|--------------------|---------------------|
| PVA                        | 2.25       | 17.59       | 0               | 0              | Take 8.2g → | 0                  | 0                   |
| VPVA-0%ANF                 | 2.25       | 12.75       | 0               | 0              | Take 6.2g → | 2                  | 0                   |
| VPVA-0.05%ANF              | 2.25       | 12.25       | 0.5             | 0              | Take 6.2g → | 2                  | 0                   |
| VPVA-0.10%ANF              | 2.25       | 11.75       | 1               | 0              | Take 6.2g → | 2                  | 0                   |
| VPVA-0.15%ANF              | 2.25       | 11.25       | 1.5             | 0              | Take 6.2g → | 2                  | 0                   |
| VPVA-0.20%ANF              | 2.25       | 10.75       | 2               | 0              | Take 6.2g → | 2                  | 0                   |
| VPVA-0.15%ANF-<br>5.04%KI  | 2.25       | 7.5         | 1.5             | 3.75           | Take 6.2g → | 2                  | 0                   |
| VPVA-0.15%ANF-<br>6.72%KI  | 2.25       | 6.25        | 1.5             | 5              | Take 6.2g → | 2                  | 0                   |
| VPVA-0.15%ANF-<br>8.40%KI  | 2.25       | 5           | 1.5             | 6.25           | Take 6.2g → | 2                  | 0                   |
| VPVA-0.15%ANF-<br>10.08%KI | 2.25       | 3.75        | 1.5             | 7.5            | Take 6.2g → | 2                  | 0                   |
| VPVA-8.40%KI               | 2.25       | 6.5         | 0               | 6.25           | Take 6.2g → | 2                  | 0                   |
| LPVA-0.15%ANF-<br>8.40%KI  | 2.25       | 5           | 1.5             | 6.25           | Take 6.2g → | 0                  | 2                   |

85

86

87 **Reference**

- 88 [1] S. Shi, X. Peng, T. Liu, Y.-N. Chen, C. He, H. Wang, *Polymer* **2017**, *111*, 168.  
89 [2] O. Hu, J. Lu, S. Weng, L. Hou, X. Zhang, X. Jiang, *Polymer* **2022**, *254*, 125109.  
90 [3] J. Yang, Z. Liu, K. Li, J. Hao, Y. Guo, M. Guo, Z. Li, S. Liu, H. Yin, X. Shi, G. Qin, G. Sun, L.  
91 Zhu, Q. Chen, *ACS Appl. Mater. Interfaces* **2022**, *14*, 39299.  
92 [4] L. Han, K. Liu, M. Wang, K. Wang, L. Fang, H. Chen, J. Zhou, X. Lu, *Adv. Funct. Mater.* **2018**,  
93 *28*, 1704195.  
94 [5] Y. Wu, W. Xing, J. Wen, Z. Wu, Y. Zhang, H. Zhang, H. Wu, H. Yao, H. Xue, J. Gao, *Polymer*  
95 **2023**, *267*, 125661.  
96 [6] J. Yang, J. Hao, C. Tang, Y. Guo, M. Guo, Z. Li, S. Liu, H. Yu, G. Qin, Q. Chen, *Journal of*  
97 *industrial and engineering chemistry* **2022**, *116*, 207.  
98
